# Supplementary material for: Spatio-temporal snow data assimilation with the ICESat-2 laser altimeter
Source: Copernicus journal article supplement (doi:10.5194/tc-19-3831-2025), 2025-09-16
Supplement: Supplementary file 1 [file tc-19-3831-2025-supplement.pdf]

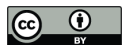

*Supplement of*

## **Spatio-temporal snow data assimilation with the ICESat-2 laser altimeter**

**Marco Mazzolini et al.**

*Correspondence to:* Marco Mazzolini (marcomaz@uio.no)

The copyright of individual parts of the supplement might differ from the article licence.

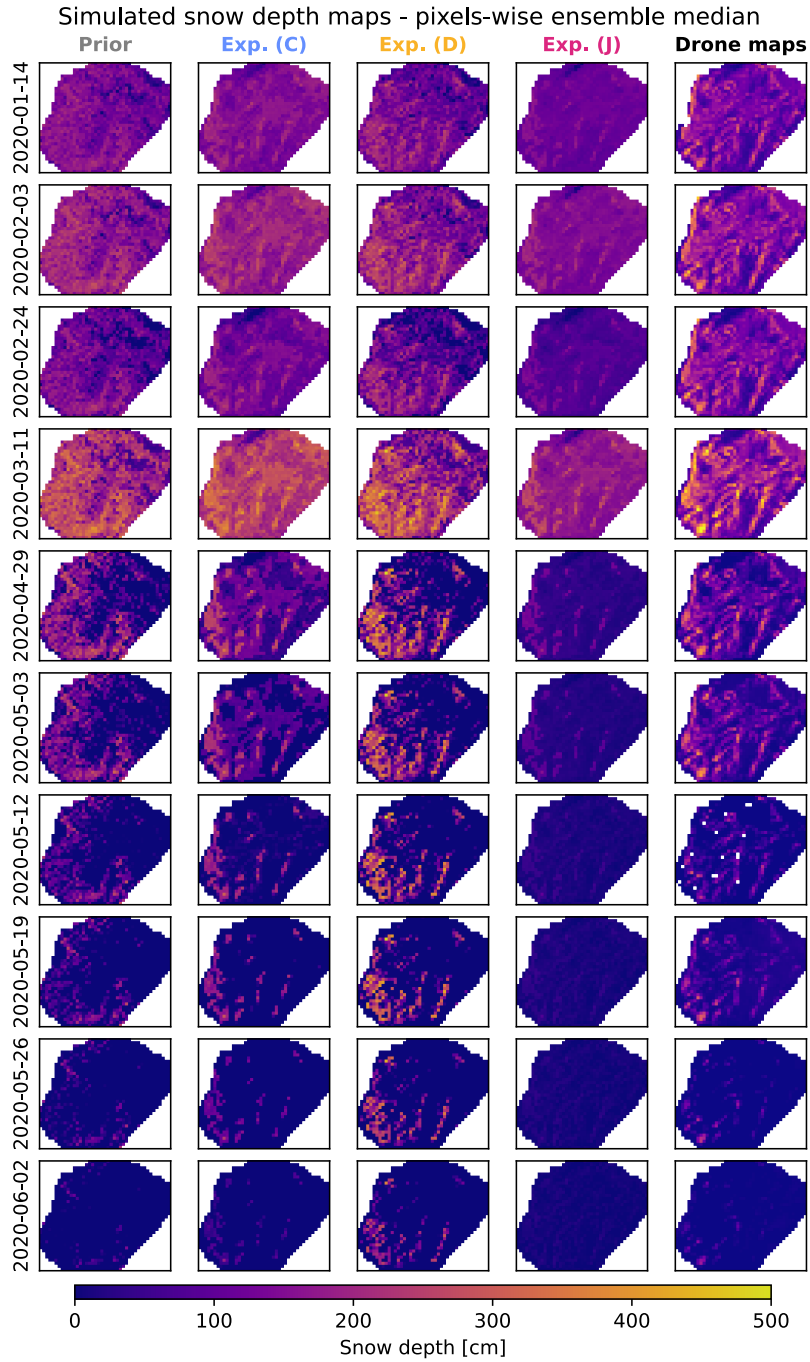

**Figure S1.** Supplement to the results. For experiments (C),(D), and (J) the simulations are compared to the available drone-based snow maps of the experimental catchment used as validation. In contrast with Figure 5 in the paper, each pixel's snow depth is selected as the median of all the ensembles, so the spatial structure dictated by the prior covariance is not represented in the maps; it is in contrast possible to appreciate a smoother spatial distribution.
